# Supplementary material
Source: PubMed Central journal article supplement (PMC6448401)
Supplement: NIHMS1008826-supplement-Fig_S2.pdf [file NIHMS1008826-supplement-Fig_S2.pdf]

A

Change in Mean Heart Rates During Cycle 1 Day 1

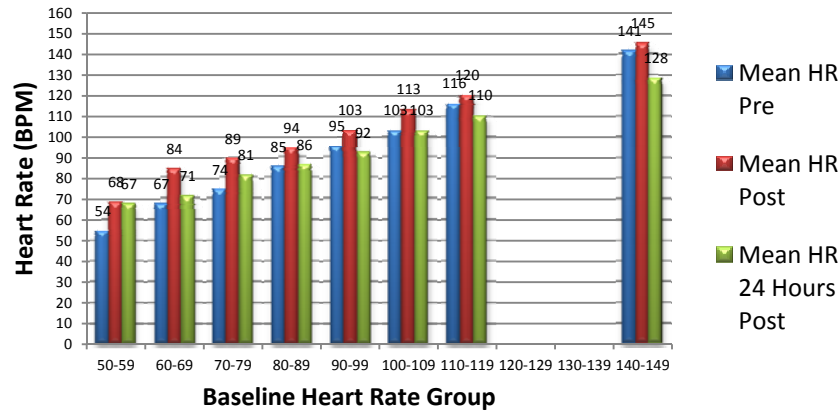

Number of patients: 4, 9, 16, 16, 9, 6, 2, 0, 0, 1

B

Change in Mean Heart Rates During Cycle 1 Day 8

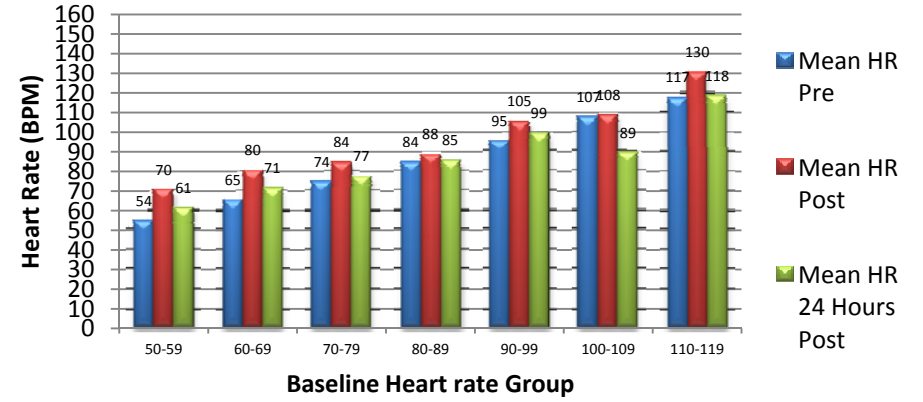

Number of patients: 6, 13, 22, 10, 6, 2, 2

C

Change in Mean Heart Rate During Cycle 1 Day 15

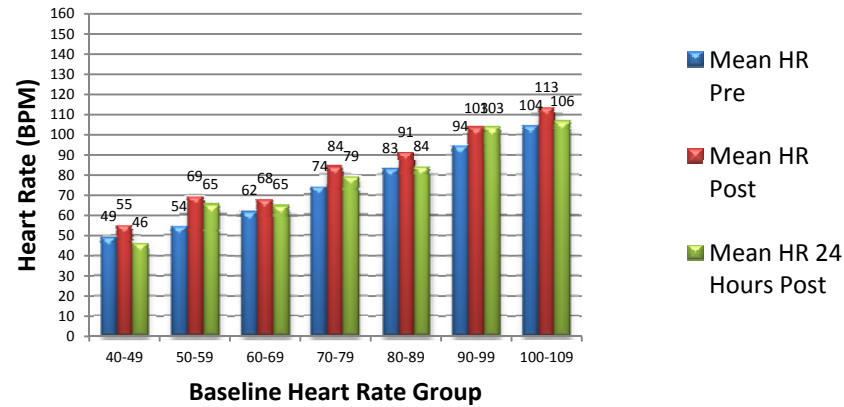

Number of patients: 1, 5, 7, 24, 11, 4, 3

Figure S2 A – C.
