# Supplementary material
Source: PubMed Central journal article supplement (PMC6448401)
Supplement: NIHMS1008826-supplement-Fig_S4.pdf [file NIHMS1008826-supplement-Fig_S4.pdf]

A

**Change in Mean Heart Rates During Cycle 1 Day 1  
Excluding Patients on Beta-Blockers**

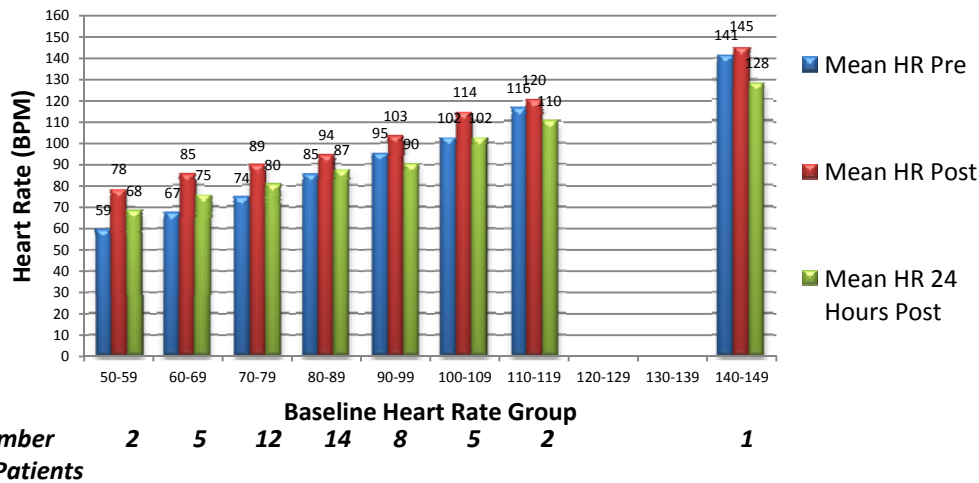

B

**Change in Mean Heart Rates for Cycle 1 Day 8  
Excluding Patients On Beta-Blockers**

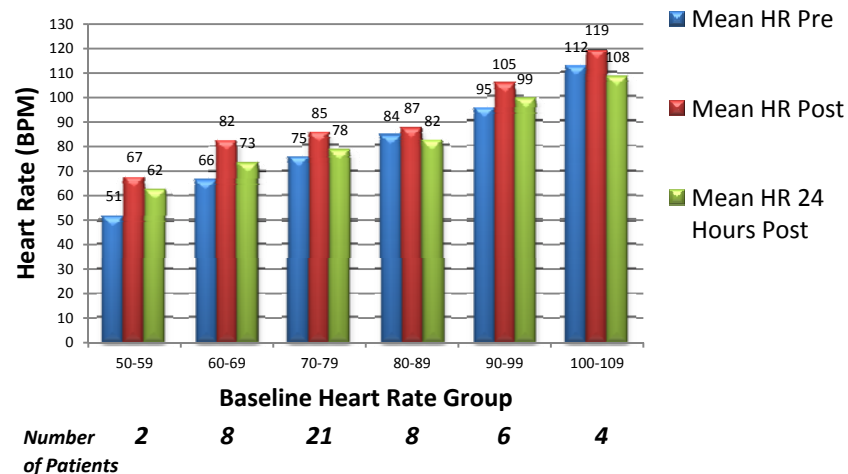

C

**Change in Mean Heart Rate During Cycle 1 Day 15  
Excluding Patients On Beta-Blockers**

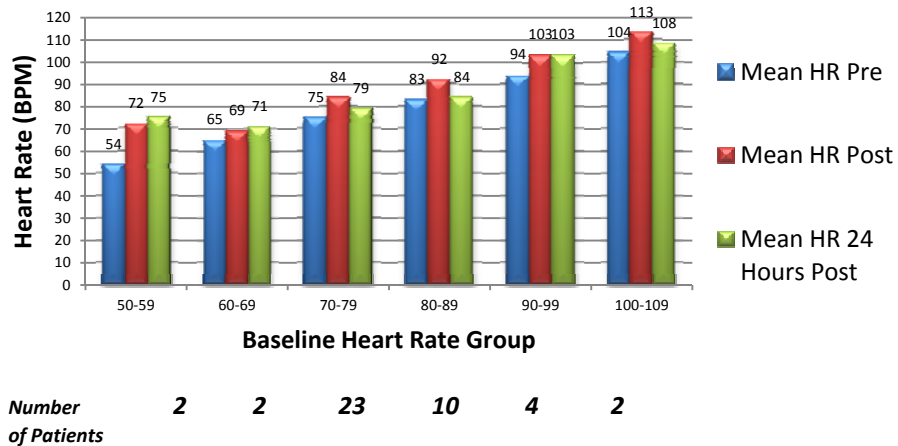

**Figures S4 A-C**
