# Supplementary material
Source: PubMed Central journal article supplement (PMC6448401)
Supplement: NIHMS1008826-supplement-Fig_S6.pdf [file NIHMS1008826-supplement-Fig_S6.pdf]

A

Heart Rate for Cycle 2 Day 1 Excluding Patients on Beta-Blockers

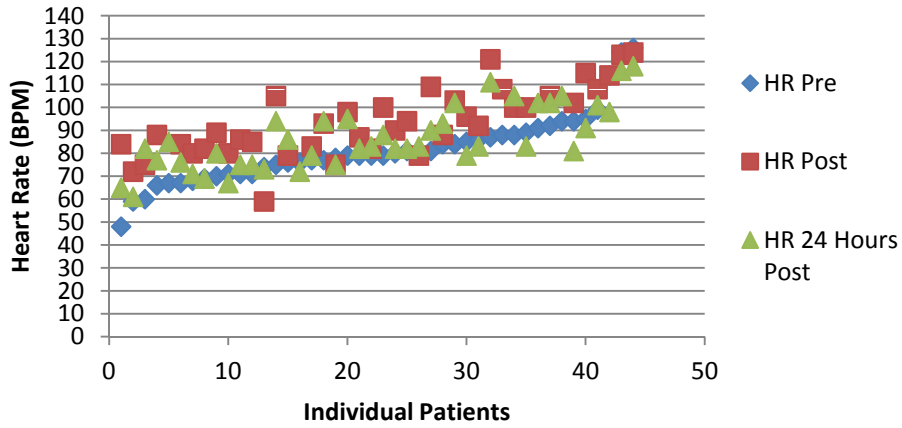

B

Heart Rate During Cycle 2 Day 8 Excluding Patients On Beta-Blockers

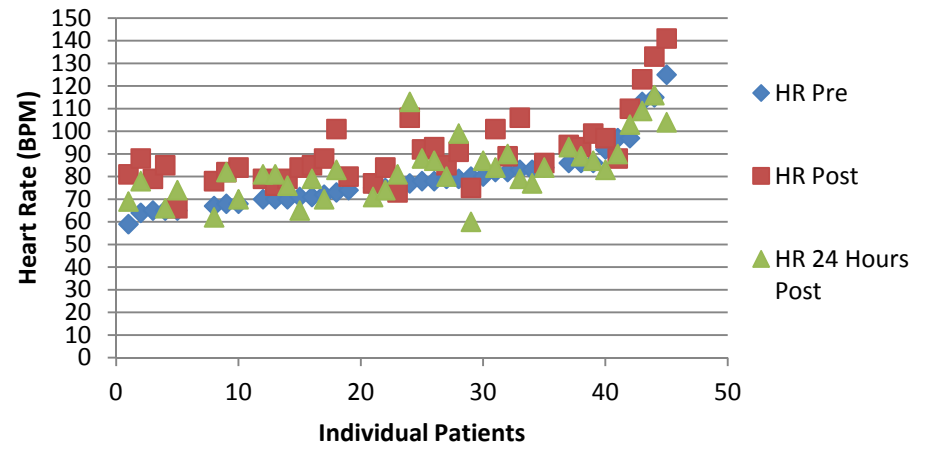

C

Heart Rate During Cycle 2 Day 15 Excluding Patients On Beta-Blockers

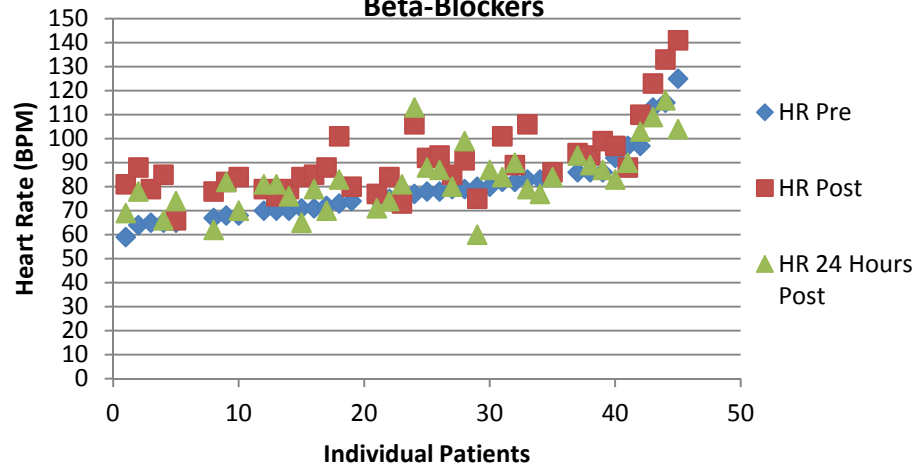

Figure S6 A – C.
