# Supplementary material
Source: PubMed Central journal article supplement (PMC6448401)
Supplement: NIHMS1008826-supplement-Fig_S7.pdf [file NIHMS1008826-supplement-Fig_S7.pdf]

A

**Change in Mean Heart Rate During Cycle 2 Day 1**

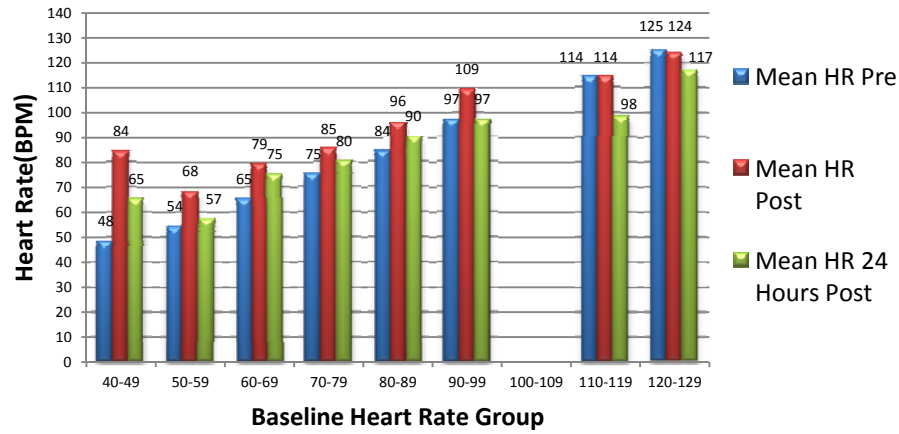

Number of Patients: 1, 3, 10, 17, 14, 6, 0, 1, 2

B

**Change in Mean Heart Rate During Cycle 2 Day 8**

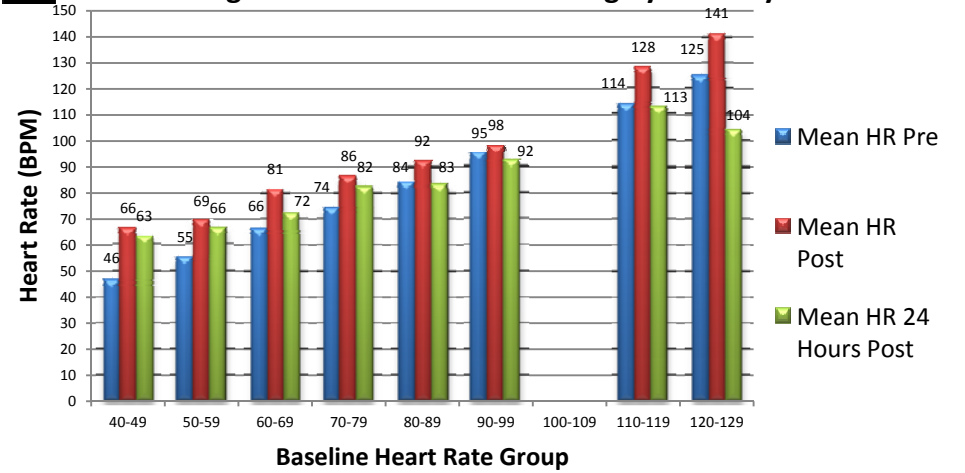

Number of Patients: 2, 3, 10, 17, 11, 3, 0, 2, 1

C

**Change in Mean Heart Rate During Cycle 2 Day 15**

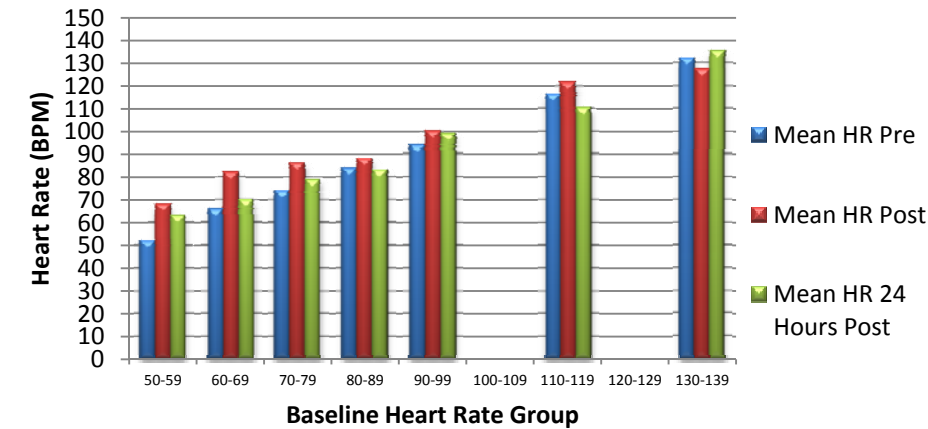

Number of Patients: 7, 6, 16, 6, 5, 0, 2, 1

Figure S7 A – C.
