# Supplementary material
Source: PubMed Central journal article supplement (PMC6448401)
Supplement: NIHMS1008826-supplement-Fig_S8.pdf [file NIHMS1008826-supplement-Fig_S8.pdf]

A

**Change in Mean Heart Rate During Cycle 2 Day 1  
Excluding patients On Beta-Blockers**

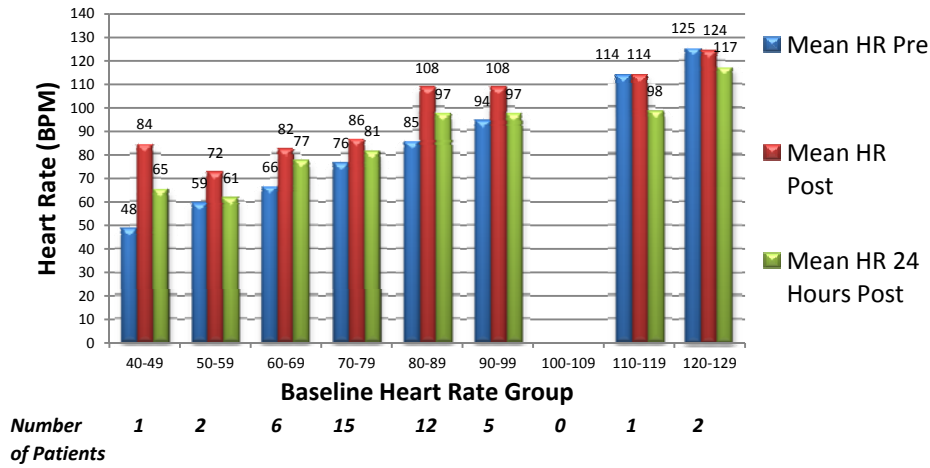

B

**Change in Mean Heart Rate During Cycle 2 Day 8  
Excluding Patients On Beta-Blockers**

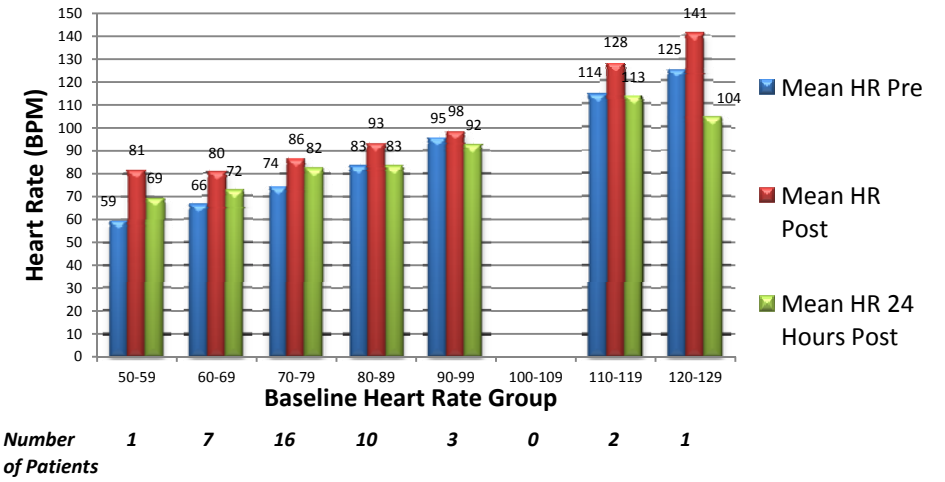

C

**Change in Mean Heart Rate During Cycle 2 Day 15  
Excluding Patients On Beta-Blockers**

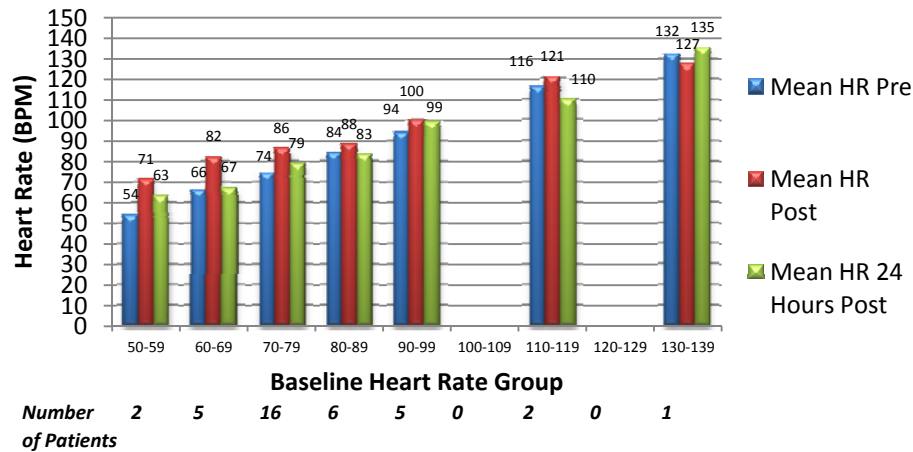

Figures S8 A-C.
