# Supplementary material
Source: PubMed Central journal article supplement (PMC6448401)
Supplement: NIHMS1008826-supplement-Supplemental_tables.pdf [file NIHMS1008826-supplement-Supplemental_tables.pdf]

## Supplementary Data

### Supplementary Table Legends

**Table S1.** Diplotype arrangements of the ABCB1 SNPs calculated using Haploview. (Reproduced with authors' permission, Sissung et al, 2011(13). Diplotypes were grouped based on whether or not the patient carried a fully wild-type or fully variant haplotype. This approach was based on a report by Kimchi-Sarfaty C et al, (*Science* 2007;315:525–8) where it was noted that protein affinity and folding was different between these haplotypes.

\*Any combination of alleles that is not mutually exclusive with another diplotype consisting of all three SNPs.

♦Any combination of alleles that is not mutually exclusive with another diplotype consisting of only the 2677 and 3435 SNPs.

ˆThis SNP was excluded in the Diplotypes 6-10 calculations.

§Individuals carrying two copies of 1236T-2677G (n=4) were classified as Diplotype 8.

**Table S2.** Analysis of reported cardiovascular events for all 131 patients in NCI 1312.

N= number of patients

\*One SVT (Atrial flutter) event was attributed to disease

\*\*One patient had 2 and another patient had 4 consecutive grade 4 troponin levels measured within one 24 hour period. The patient with the 4 grade 4 levels within 24 hours was subsequently diagnosed with an intracardiac lymphomatous mass.

**Table S3.** Statistical Analyzes of Albumin, Potassium & Magnesium Data

P-values for first three cycles.

I. Wilcoxon rank sum test results. No p-value is reported if n<3 for any group. Unless indicated otherwise (-), the median albumin level was highest in the group dichotomized above the replacement limit or above the lower limit of normal.

II. Fisher's exact test results. If  $p=1.0$ , then the observed frequencies fit exactly with the null hypothesis. If  $p<1.0$ , and unless indicated otherwise (-), the observed frequencies support the alternative hypothesis that higher albumin levels ( $\geq 3.7$ ) at baseline (C1 D1) are associated with either higher potassium (K) or magnesium (Mg) levels during the first three cycles.

III. Jonckheere-Terpstra trend test results. As above, no p-value is reported if  $n<3$  for any group. Unless indicated otherwise (-), the median albumin level was highest in the Neither group (= both Mg and K above cut-off level).

Note: The darker the shading, the larger the p-value.

**Table S4.** Analysis of variance to examine the relationship between albumin, potassium and magnesium levels in patients treated on NCI 1312.

Supplementary Tables

Table S1.

| Diplotype                      | Chromosome 1 |            |         | Chromosome 2 |           |         | Population Frequency (%) |
|--------------------------------|--------------|------------|---------|--------------|-----------|---------|--------------------------|
|                                | 1236C>T      | 2677 G>T/A | 3435C>T | 1236C>T      | 2677G>T/A | 3435C>T |                          |
| <b>Diplotype 1</b>             | C            | G          | C       | C            | G         | C       | 17 (15.3)                |
| <b>Diplotype 2</b>             | C            | G          | C       | *            | *         | *       | 32 (28.8)                |
| <b>Diplotype 3</b>             | C            | G          | C       | T            | T/A       | T       | 23 (20.7)                |
| <b>Diplotype 4</b>             | T            | T/A        | T       | *            | *         | *       | 25 (22.5)                |
| <b>Diplotype 5</b>             | T            | T/A        | T       | T            | T/A       | T       | 14 (12.6)                |
| <b>Diplotype 6</b>             | C            | G          | -       | C            | G         | -       | 27 (24.3)                |
| <b>Diplotype 7</b>             | C            | G          | -       | ♣            | ♣         | -       | 17 (15.3)                |
| <b>Diplotype 8<sup>s</sup></b> | C            | G          | -       | T            | T/A       | -       | 41 (36.9)                |
| <b>Diplotype 9</b>             | T            | T/A        | -       | ♣            | ♣         | -       | 9 (8.1)                  |
| <b>Diplotype 10</b>            | T            | T/A        | -       | T            | T/A       | -       | 17 (15.3)                |
| <b>Diplotype 11</b>            | -            | G          | C       | -            | G         | C       | 23 (20.7)                |
| <b>Diplotype 12</b>            | -            | G          | C       | -            | ♣         | ♣       | 22 (19.8)                |
| <b>Diplotype 13</b>            | -            | G          | C       | -            | T/A       | T       | 29 (26.1)                |
| <b>Diplotype 14</b>            | -            | T/A        | T       | -            | ♣         | ♣       | 22 (19.8)                |
| <b>Diplotype 15</b>            | -            | T/A        | T       | -            | T/A       | T       | 15 (13.5)                |

| <b>Table S2. Analysis of Reported Cardiovascular Adverse Events for all 131 study participants</b> |                             |                        |                        |                        |                        |                        |
|----------------------------------------------------------------------------------------------------|-----------------------------|------------------------|------------------------|------------------------|------------------------|------------------------|
| <b>Cycle</b>                                                                                       | <b>Event</b>                | <b>Grade 1<br/>(n)</b> | <b>Grade 2<br/>(n)</b> | <b>Grade 3<br/>(n)</b> | <b>Grade 4<br/>(n)</b> | <b>Grade 5<br/>(n)</b> |
| <b>1</b>                                                                                           |                             |                        |                        |                        |                        |                        |
|                                                                                                    | SVT                         | 5                      | -                      | 3*                     | 0                      | -                      |
|                                                                                                    | VT                          | 5                      |                        | 1                      |                        |                        |
|                                                                                                    | AIVR                        | -                      | -                      | 1                      | -                      | -                      |
|                                                                                                    | Nodal/Junctional Arrhythmia | -                      | -                      | -                      | -                      | -                      |
|                                                                                                    | Impairment of LVEF          | -                      | -                      | -                      | -                      | -                      |
| <b>Cycle</b>                                                                                       |                             |                        |                        |                        |                        |                        |
| <b>Cycle</b>                                                                                       | <b>Event</b>                | <b>Grade 1<br/>(n)</b> | <b>Grade 2<br/>(n)</b> | <b>Grade 3<br/>(n)</b> | <b>Grade 4<br/>(n)</b> | <b>Grade 5<br/>(n)</b> |
| <b>All Cycles</b>                                                                                  |                             |                        |                        |                        |                        |                        |
|                                                                                                    | SVT                         | 8                      | 1                      | 5                      | -                      | -                      |
|                                                                                                    | VT                          | 10                     | 1                      | 1                      | -                      | -                      |
|                                                                                                    | AIVR                        | -                      | -                      | 1                      | -                      | -                      |
|                                                                                                    | Nodal/Junctional Arrhythmia | 1                      | -                      | -                      | -                      | -                      |
|                                                                                                    | Impairment of LVEF          | 1                      | -                      | -                      | -                      | -                      |
|                                                                                                    | Cardiac death               | -                      | -                      | -                      | -                      | 2 <sup>§</sup>         |

**Table S3.**

| Test                             | C1 D1    | C1 D8   | C1 D15   | C2 D1   | C2 D8    | C2 D15  | C3 D1   | C3 D8    | C3 D15  |
|----------------------------------|----------|---------|----------|---------|----------|---------|---------|----------|---------|
| <b>I. Wilcoxon rank sum test</b> | (79,40)* | (75,41) | (73,35)  | (70,31) | (64,27)  | (62,24) | (61,21) | (58,20)  | (55,20) |
| <b>CTCL</b>                      |          |         |          |         |          |         |         |          |         |
| Dich at Rpl L Mg                 | 0.13     | 0.14    | 0.64     | 0.016   | 0.48     | 0.091   | 0.73    | 0.45 (-) | 0.47    |
| Dich at LLN Mg                   | 0.43 (-) | 0.004   | 0.039    | 0.23    | 0.90     | 0.59    | 0.083   | 0.30     | 0.24    |
| Dich at Rpl L K                  | 0.39     | 0.87    | 0.005    | 0.025   | 0.058    | 0.21    | 0.0007  | 0.087    | 0.40    |
| Dich at LLN K                    | 0.97     | 0.59    | 0.002    | 0.66    | 0.77 (-) |         | 0.049   | 0.005    | 0.013   |
| <b>PTCL</b>                      |          |         |          |         |          |         |         |          |         |
| Dich at Rpl L Mg                 | 0.12     | 0.64    | 0.63     | 0.080   | 0.23     | 0.14    | 0.20    | 0.67     | 0.58    |
| Dich at LLN Mg                   | 0.005    | 0.11    | 0.13     | 0.021   | 0.010    | 0.34    |         | 0.80     |         |
| Dich at Rpl L K                  | 0.25     | 0.85    | 0.57 (-) | 0.38    | 0.24     | 0.16    |         | 0.92     | 0.66    |
| Dich at LLN K                    | 0.41     | 0.62    | 0.62     |         |          |         |         |          |         |
| <b>CTCL + PTCL</b>               |          |         |          |         |          |         |         |          |         |
| Dich at Rpl L Mg                 | 0.028    | 0.13    | 0.54     | 0.003   | 0.17     | 0.028   | 0.24    | 0.80 (-) | 0.41    |
| Dich at LLN Mg                   | 0.36     | 0.0008  | 0.011    | 0.018   | 0.053    | 0.26    | 0.032   | 0.27     | 0.042   |
| Dich at Rpl L K                  | 0.15     | 0.85    | 0.029    | 0.017   | 0.024    | 0.073   | 0.002   | 0.15     | 0.15    |
| Dich at LLN K                    | 0.60     | 0.48    | 0.008    | 0.64    | 0.12     | 0.0003  | 0.025   | 0.001    | 0.17    |
| <b>II. Fisher's exact test</b>   |          |         |          |         |          |         |         |          |         |
| <b>CTCL</b>                      |          |         |          |         |          |         |         |          |         |
| Dich at Rpl L Mg                 | 0.35     | 0.47    | 0.47 (-) | 1.0     | 0.79 (-) | 0.61    | 1.0     | 0.77     | 0.40    |
| Dich at Rpl L K                  | 0.34     | 0.62    | 0.028    | 0.023   | 0.013    | 0.60    | 0.004   | 0.56     | 0.073   |
| <b>PTCL</b>                      |          |         |          |         |          |         |         |          |         |
| Dich at Rpl L Mg                 | 0.52     | 1.0     | 1.0      | 0.29    | 0.057    | 0.67    | 1.0     | 0.55     | 1.0     |
| Dich at Rpl L K                  | 0.041    | 1.0     | 1.0      | 0.43    | 0.45     | 0.41    | 1.0     | 1.0      | 0.16    |
| <b>CTCL + PTCL</b>               |          |         |          |         |          |         |         |          |         |
| Dich at Rpl L Mg                 | 0.26     | 0.57    | 0.56 (-) | 0.84    | 0.83     | 0.37    | 1.0     | 1.0      | 0.35    |
| Dich at Rpl L K                  | 0.079    | 0.34    | 0.037    | 0.031   | 0.003    | 0.50    | 0.004   | 0.45     | 0.066   |

| Test                                                          | C1 D1    | C1 D8    | C1 D15    | C2 D1  | C2 D8 | C2 D15 | C3 D1 | C3 D8    | C3 D15 |
|---------------------------------------------------------------|----------|----------|-----------|--------|-------|--------|-------|----------|--------|
| <b>III. Jonckheere-Terpstra trend test</b>                    |          |          |           |        |       |        |       |          |        |
| <b>CTCL</b>                                                   |          |          |           |        |       |        |       |          |        |
| Both vs Either vs Neither Rpl L                               | 0.10     | 0.29     | 0.041     | 0.001  | 0.065 | 0.055  | 0.013 | 0.79 (-) | 0.25   |
| Both vs Either vs Neither LLN                                 |          |          | 0.002     |        |       |        |       |          |        |
| <b>PTCL</b>                                                   |          |          |           |        |       |        |       |          |        |
| Both vs Either vs Neither Rpl L                               | 0.048    | 0.68 (-) | 0.91      | 0.092  | 0.094 | 0.049  |       | 0.59 (-) | 0.56   |
| Both vs Either vs Neither LLN                                 |          | 0.23     |           |        |       |        |       |          |        |
| <b>CTCL + PTCL</b>                                            |          |          |           |        |       |        |       |          |        |
| Both vs Either vs Neither Rpl L                               | 0.011    | 0.22 (-) | 0.076 (-) | 0.0003 | 0.012 | 0.006  | 0.006 | 0.49 (-) | 0.13   |
| Both vs Either vs Neither LLN                                 | 0.21 (-) | 0.008    | 0.001     |        |       |        |       |          |        |
| * Maximum sample size for CTCL and PTCL groups, respectively. |          |          |           |        |       |        |       |          |        |

| <b>Table S4. Repeated measures ANOVA results.</b> |             |               |         |         |
|---------------------------------------------------|-------------|---------------|---------|---------|
| Model                                             | Cut-off     | Histology     | Effects | P-value |
| 1                                                 | Replacement | CTCL          | K       | 0.002   |
|                                                   |             |               | Day     | 0.004   |
| 2                                                 | Replacement | PTCL          | Mg      | 0.003   |
| 3                                                 | Replacement | CTCL and PTCL | Mg      | 0.002   |
|                                                   |             |               | K       | 0.004   |
| 4                                                 | Lower Limit | CTCL          | Mg      | 0.043   |
|                                                   |             |               | Day     | 0.006   |
| 5                                                 | Lower Limit | PTCL          | Mg      | 0.032   |
| 6                                                 | Lower Limit | CTCL and PTCL | Mg      | 0.003   |
