# Supplementary material
Source: PubMed Central journal article supplement (PMC6448401)

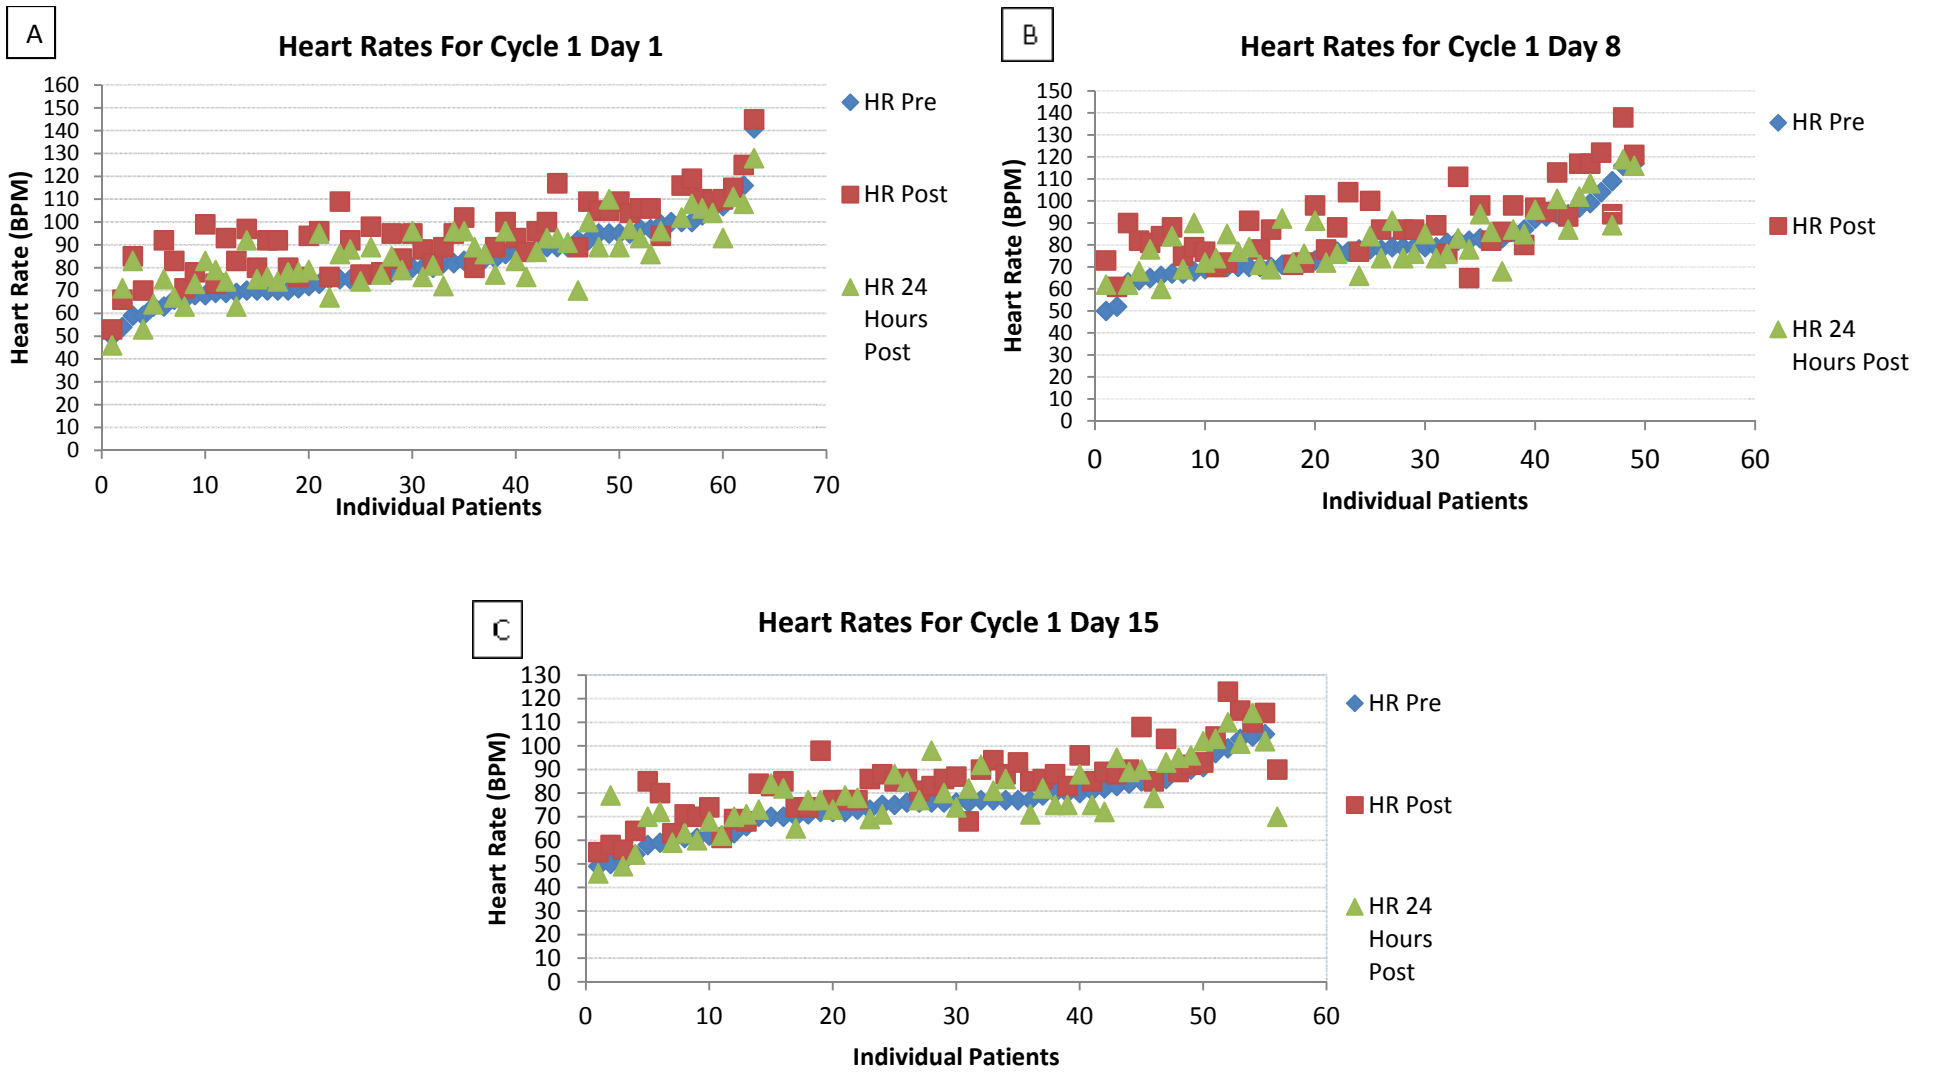

Figure S1 A – C.

Supplement: NIHMS1008826-supplement-Fig_S1.pdf [file NIHMS1008826-supplement-Fig_S1.pdf]

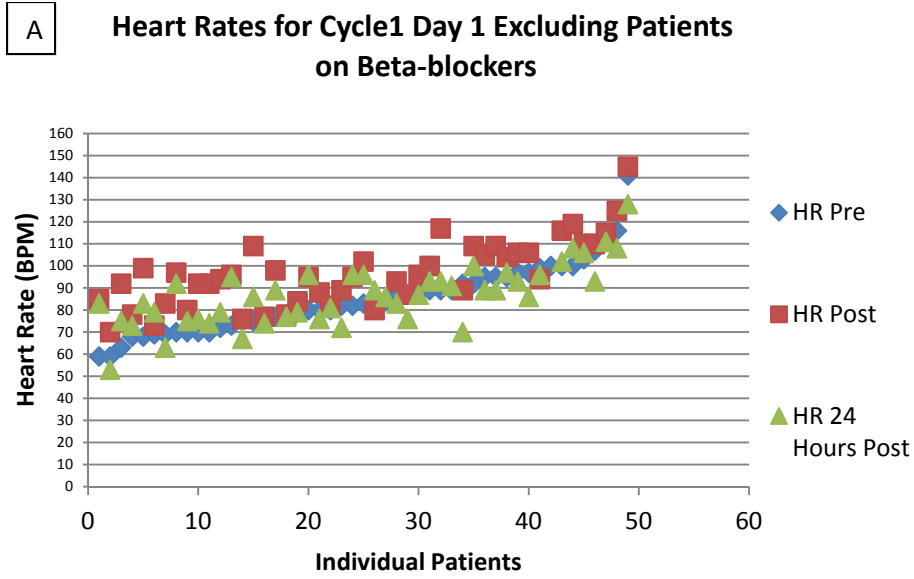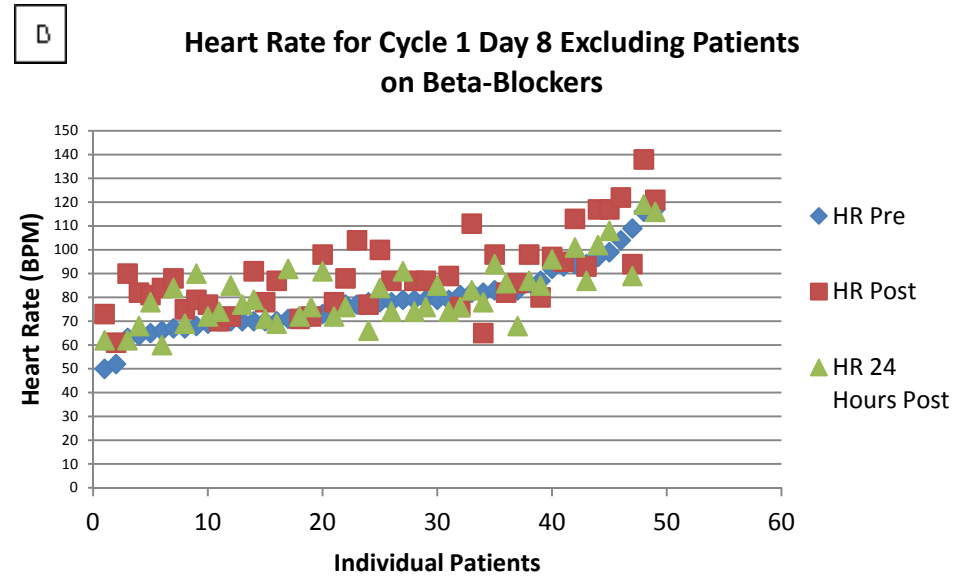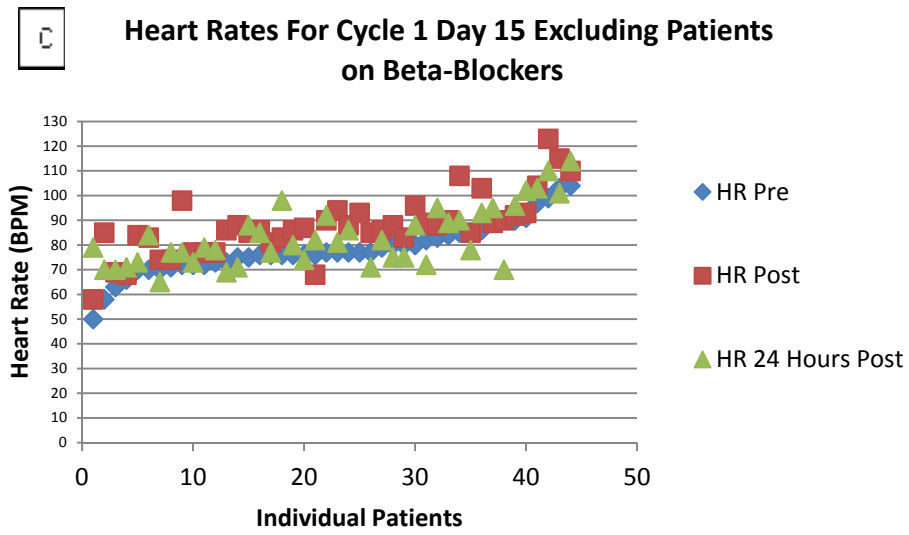

Figures S3 A–C.

Supplement: NIHMS1008826-supplement-Fig_S3.pdf [file NIHMS1008826-supplement-Fig_S3.pdf]

A

Heart Rates for Cycle 2 Day 1

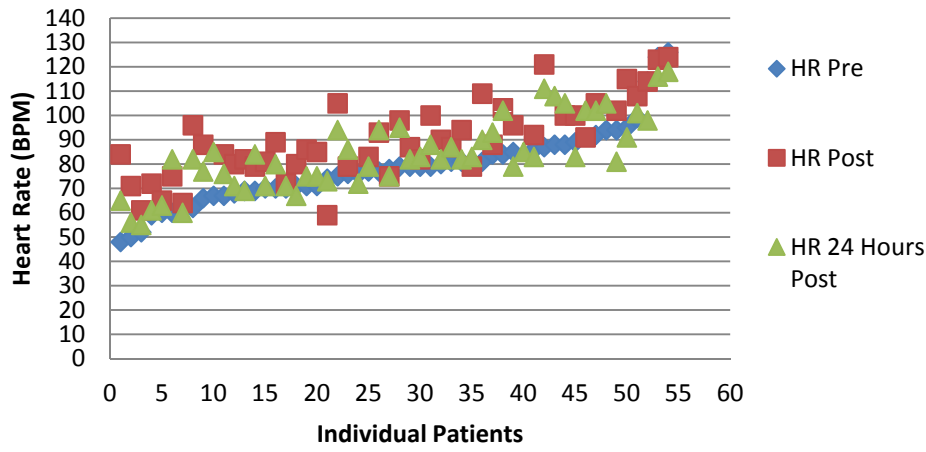

B

Heart Rates for Cycle 2 Day 8

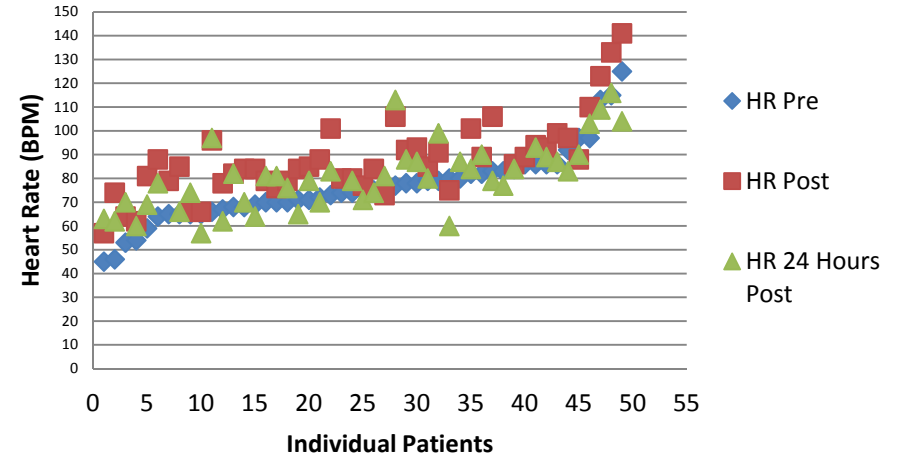

C

Heart Rates For Cycle 2 Day 15

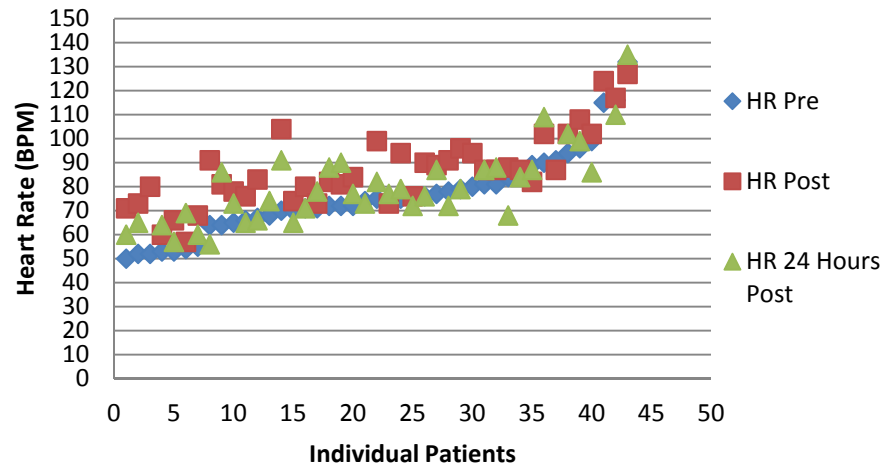

Figure S5 A – C.

Supplement: NIHMS1008826-supplement-Fig_S5.pdf [file NIHMS1008826-supplement-Fig_S5.pdf]
